# Supplementary material
Source: publisher figshare collection journal article supplement (https://tandf.figshare.com/ndownloader/files/14080196)
Supplement: Supplementary file 1 [file 14080196]

Supplement

Two M(II)-diphosphonate coordination polymers: structural, fluorescent and magnetic studies (M=Cu,Ca)

Kui-Rong Ma*, Li Cao, Jing-Jing Liu and Shang-Ji Li

Captions

**Fig.** **S1** IR spectra of **1**-**2**.

**Fig. S2** Experimental and simulated powder X-ray diffraction patterns of **1**-**2**.


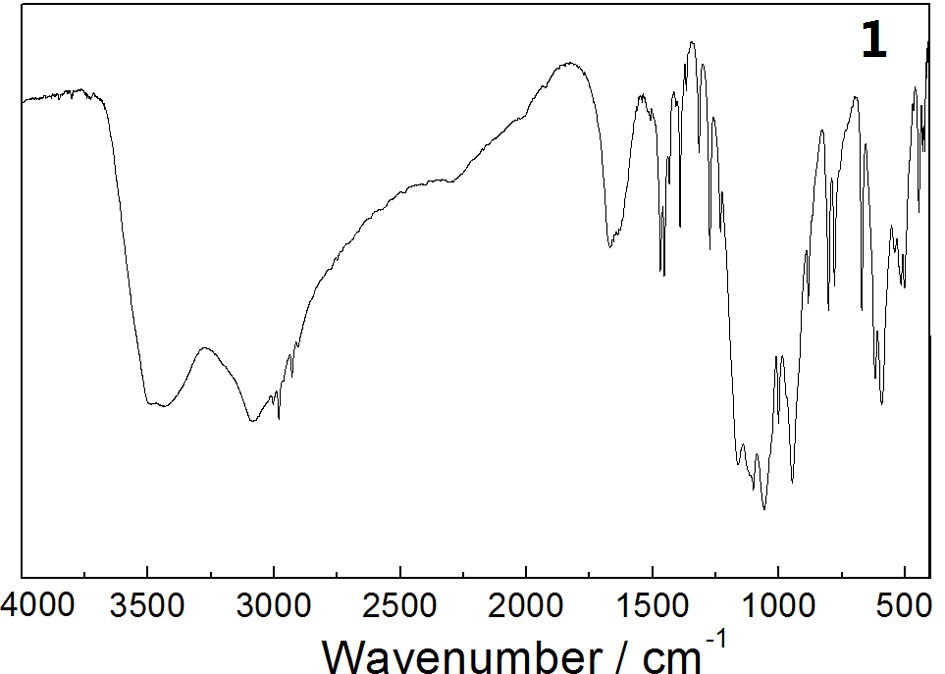

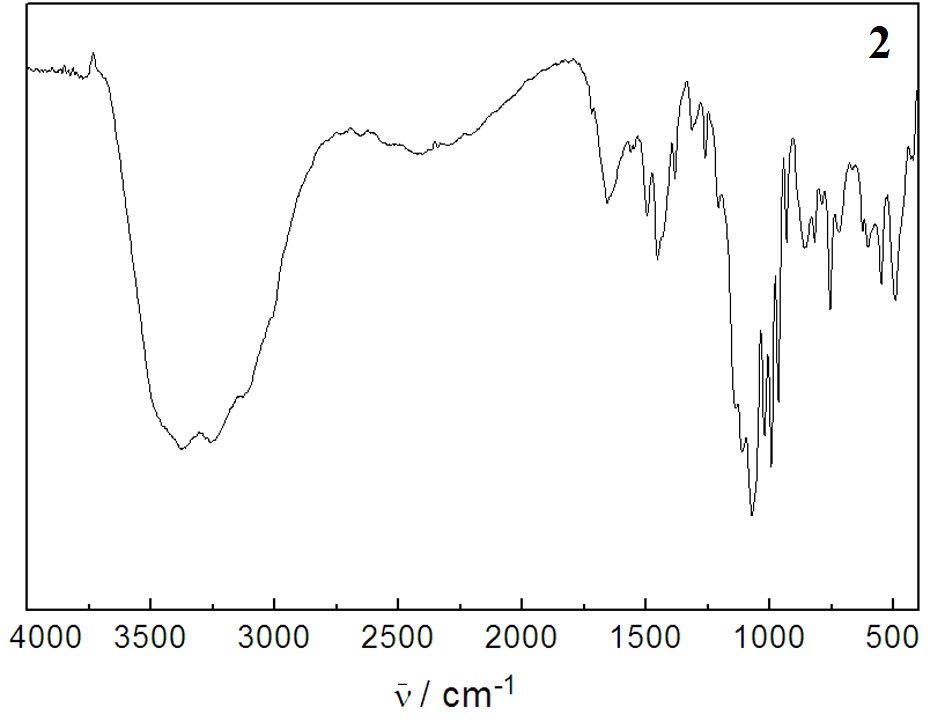


**Fig.** **S1** IR spectra of **1**-**2**.


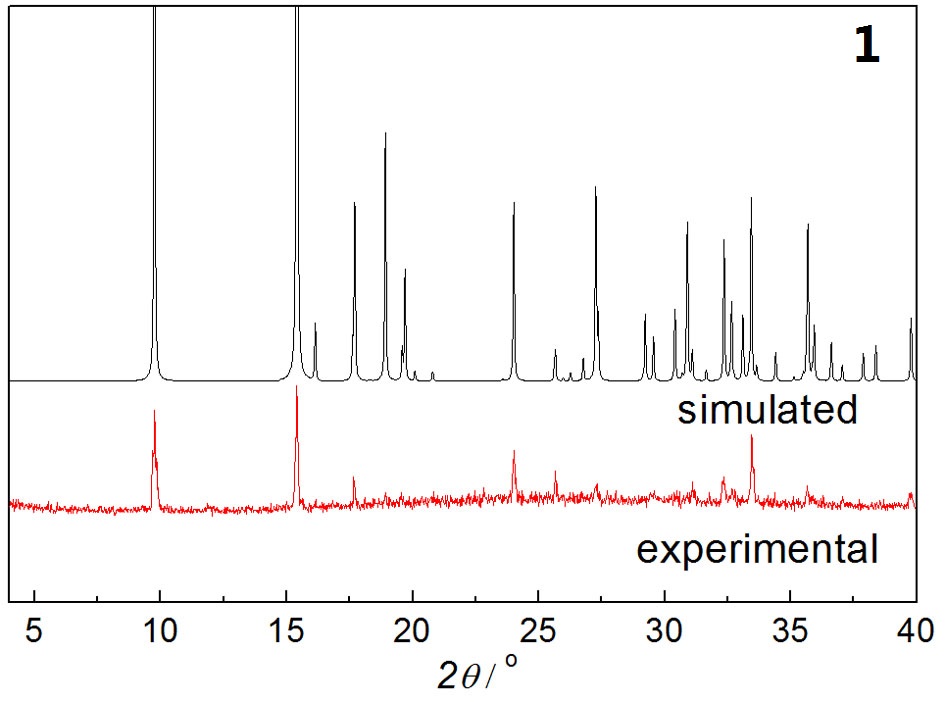

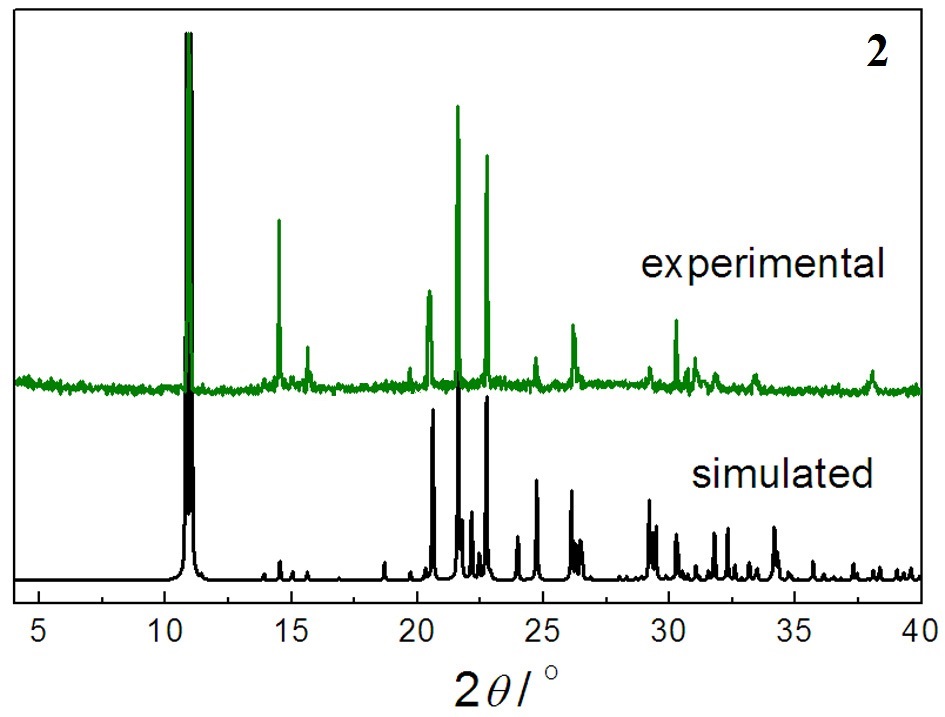


**Fig. S2** Experimental and simulated powder X-ray diffraction patterns of **1**-**2**.
